# Supplementary material
Source: ML conference proceedings conference paper supplement (https://proceedings.mlr.press/v33/sasaki14.html)
Supplement: Supplementary file [file sasaki14-supp.pdf]

---

# Supplementary Material for “Estimating Dependency Structures for non-Gaussian Components with Linear and Energy Correlations”

---

Hiroaki Sasaki<sup>1</sup>   Michael U. Gutmann<sup>2</sup>   Hayaru Shouno<sup>1</sup>   Aapo Hyvärinen<sup>3,4</sup>  
hsasaki@cc.uec.ac.jp   michael.gutmann@helsinki.fi   shouno@uec.ac.jp   aapo.hyvarinen@helsinki.fi

<sup>1</sup>Graduate School of Informatics and Engineering, The University of Electro-Communications, Tokyo, Japan

<sup>2</sup>Department of Mathematics and Statistics and HIIT, University of Helsinki, Helsinki, Finland

<sup>3</sup>Department of Computer Science and HIIT, University of Helsinki, Helsinki Finland

<sup>4</sup>ATR Cognitive Mechanisms Laboratories, Kyoto, Japan

## A Details for the Permutation Algorithm

Here, we describe the permutation algorithm used in Section 3. The goal of this algorithm is to estimate an order vector  $\mathbf{k} = (k_1, k_2, \dots, k_d)$  where  $k_i \in \{1, 2, \dots, d\}$  so that  $\mathbf{M}$  in Figure 2(b) approaches a tridiagonal matrix. The algorithm is as follows:

---

### Greedy Permutation Algorithm

**Input:**  $\mathbf{W}$  and  $\mathbf{M}$ .

- Initialization: Set  $\hat{k}_1 = 1$  and the remaining index set  $\mathbf{I} = \{2, \dots, d\}$ , and make a matrix with zero diagonal elements by  $\mathbf{M}' = \mathbf{M} - \mathbf{M}_{diag}$  where  $\mathbf{M}_{diag}$  denotes the diagonal matrix whose diagonal elements are the diagonal ones in  $\mathbf{M}$ .

- Repeat the following procedures from  $i = 2$  to  $i = d$ :

- Find  $\hat{k}_i$  by

$$\hat{k}_i = \arg \max_{j \in \mathbf{I}} m'_{\hat{k}_{i-1}, j} \quad (\text{A1})$$

where  $m'_{\hat{k}_{i-1}, j}$  denotes the  $(\hat{k}_{i-1}, j)$ -th element in  $\mathbf{M}'$ .

- Update  $\mathbf{I}$  by removing  $\hat{k}_i$ :

$$\mathbf{I} \leftarrow \mathbf{I} \setminus \hat{k}_i. \quad (\text{A2})$$

**Output:**  $\hat{\mathbf{k}} = (\hat{k}_1, \hat{k}_2, \dots, \hat{k}_d)$ .

---

should be close to a tridiagonal matrix. Using  $\hat{\mathbf{k}}$ , the row vectors in  $\mathbf{W}$  were permuted as  $\mathbf{W}_p = (\mathbf{w}_{\hat{k}_1}, \mathbf{w}_{\hat{k}_2}, \dots, \mathbf{w}_{\hat{k}_d})^\top$  where  $\mathbf{w}_i$  denotes the  $i$ -th row vector in  $\mathbf{W}$ , and in Figure 2(c) and (d), we visualized the performance matrix as  $\mathbf{W}_p \mathbf{A}$  and correlation matrix for the permuted sources  $\mathbf{W}_p \mathbf{x}$ .

## B Undirected Graph for Natural Images

This section presents an undirected graph for natural images as in Figure 6 for the outputs of simulated complex cells. The graph is depicted in Figure A. It shows that features with similar orientations or positions tend to be (conditionally) dependent.

By (A1),  $m_{\hat{k}_{i-1}, \hat{k}_i}$  for all  $i$  are made to take a large value, and thus,  $\hat{\mathbf{M}}$ , whose  $(i, j)$ -th element is  $m_{\hat{k}_i, \hat{k}_j}$ ,

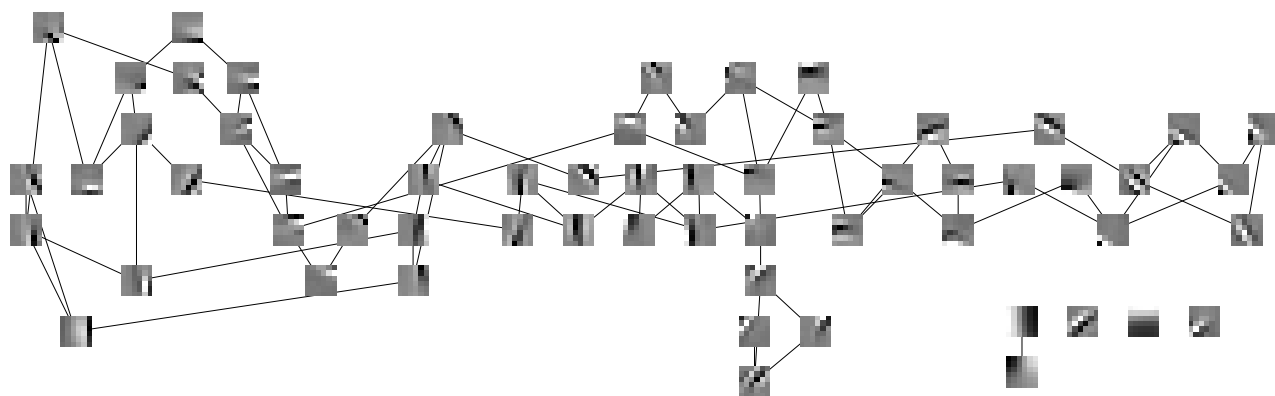

Figure A: An undirected graph for natural images. Each node corresponds to a feature estimated from natural images, and only the links which have  $m_{i,j}$  larger than 0.8 are displayed.
